# Supplementary material for: Effect on Multipotency and Phenotypic Transition of Unrestricted Somatic Stem Cells from Human Umbilical Cord Blood after Treatment with Epigenetic Agents
Source: Hindawi journal article supplement (doi:10.1155/2016/7643218), 2015-12-14
Supplement: f1 [file 7643218.f1.pdf]

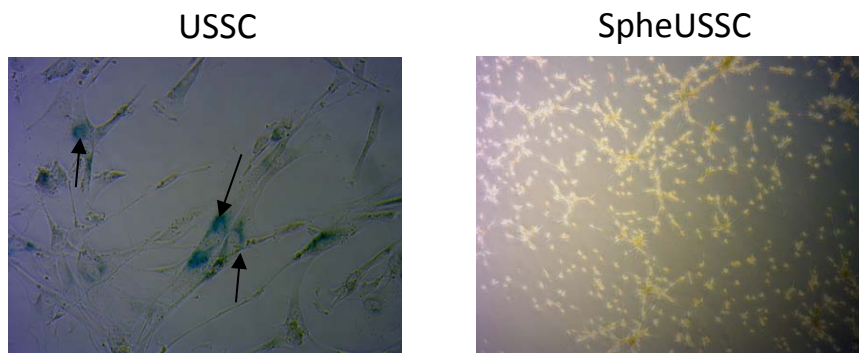

**Fig. 1.** Senescence-associated beta-galactosidase (SA- $\beta$ -gal) assay on USSC SA 8/25 cells (P6) and SpheUSSC cells (P20). Blue-dyed precipitate characteristic of senescent cells is appearing only in USSC cells (arrows) but not in SpheUSSC cells.

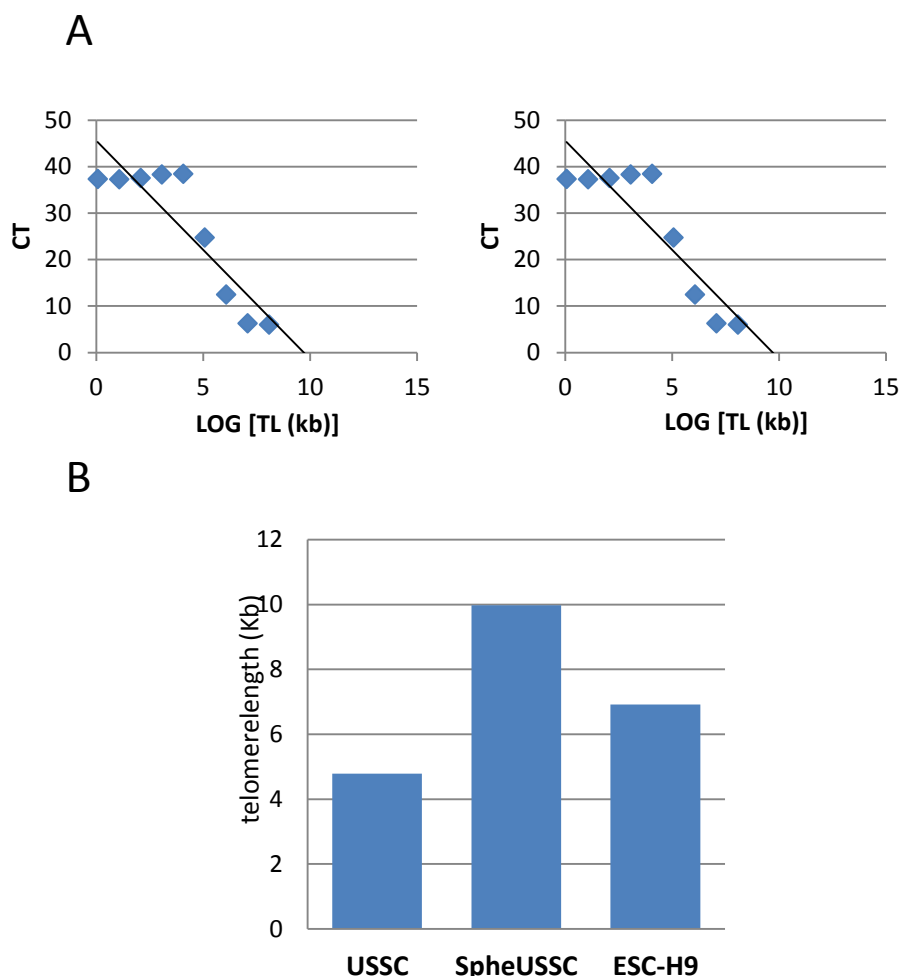

**Fig. 2.** Quantitative PCR measurement of absolute telomere length of USSC 8/25 and SpheUSSC cells (see O'Callaghan and Fenech, 2011).

Standard curves used to calculate absolute telomere length. CT (cycle threshold) is the number of PCR cycles for which enough SYBR green fluorescence was detected above background. A) Graph shows standard curve for calculating length of telomere sequence per reaction tube. X-axis represents amount of telomere sequence in kb per reaction. The value generated from the experimental samples utilising this standard curve was equal to kb of telomere sequence per sample. B) Graph shows standard curve for calculating genome copies using 36B4 copy number. C) Diagram shows telomere length of USSC, SpheUSSC and ESC-H9 cells.

| bisulfite genomic sequencing |                                                                             |                          |  |
|------------------------------|-----------------------------------------------------------------------------|--------------------------|--|
|                              | sense primer                                                                | antisense primer         |  |
| OCT4konv                     | gagggagagaggggttagtagttt                                                    | actccaacttctccttccaacttc |  |
| relative transcription       |                                                                             |                          |  |
|                              | sense primer                                                                | antisense primer         |  |
| <i>OCT4</i>                  | Gcccgaagagaaagcgaaccag                                                      | tgacggagacaggggaaaggc    |  |
| <i>SOX2</i>                  | gcggaatagcatggcgag                                                          | ccgaaccttaggagccaag      |  |
| <i>NANOG</i>                 | cagcttcacgttgcttctgc                                                        | ccgaccacctcatctagcccc    |  |
| <i>DNMT1</i>                 | cttcttcagcacaaccgtcacc                                                      | ggtgcttgccaggatgttg      |  |
| <i>hTERT</i>                 | agagtgtctggagcaagttgc                                                       | cgtagtcctgttcacaatcg     |  |
| <i>DLK</i>                   | gaccacacctgtgacccc                                                          | aggcagctcgtgcacccc       |  |
| <i>LEPTIN</i>                | gccctatctttctatgtcc                                                         | tcttgaggtagcctgaag       |  |
| <i>ALPL</i>                  | accaaagtctcgcgccac                                                          | ccacggaggcttcagggc       |  |
| <i>GAPDH</i>                 | ttggaggcaaaaagctgactg                                                       | agagatatgcagtggcgtt      |  |
| telomere length              |                                                                             |                          |  |
|                              | sense primer                                                                | antisense primer         |  |
| Telomerestandard             | Ttagggtagggtagggtagggtagggtag gtagggtagggtagggtagggtagggtagggtagggtaggg     |                          |  |
| 36B4 standard                | Cagcaagtgggaaggtgtaatccgtctccacagacaaggccaggactcgttg acccgttgatgataagaatggg |                          |  |
| teloF                        | gtttgggtttgggtttgggtttggg tttgggtt                                          |                          |  |
| teloR                        | ggcttgaccttaccttaccttacct ttaccttacct                                       |                          |  |
| 36B4F                        | cagcaagtgggaaggtgtaatcc                                                     |                          |  |
| 36B4R                        | ccattctatcatcaacgggtacaa                                                    |                          |  |
| b-globinF                    | gcttctgacacaactgtgttcactagc                                                 |                          |  |
| b-globinR                    | caccaacttcacccacgttcacc                                                     |                          |  |
| teloF                        | gtttgggtttgggtttgggtttggg tttgggtt                                          |                          |  |
| teloR                        | ggcttgaccttaccttaccttacct ttaccttacct                                       |                          |  |

Table. 1. All primers used in this study
